# Supplementary material for: Strong proton-shared hydrogen bonding in a methyl imidazole⋯HCl complex: evidence from matrix isolation infrared spectroscopy and ab initio computations
Source: Royal Society of Chemistry journal article supplement (doi:10.1039/d0nj00029a), 2020-01-01
Supplement: d0nj00029a1.pdf [file d0nj00029a1.pdf]

**Electronic Supplementary Information**

**Strong Proton Shared Hydrogen Bonding in Methyl Imidazole-HCl Complex: Evidence  
from Matrix Isolation Infrared Spectroscopy  
and *Ab initio* Computations**

**Shubhra Sarkar, P. K. Sruthi, N. Ramanathan\* and K. Sundararajan**

Materials Chemistry & Metal Fuel Cycle Group, Homi Bhabha National Institute,  
Indira Gandhi Center for Atomic Research,  
Kalpakkam – 603 102, Tamil Nadu, India

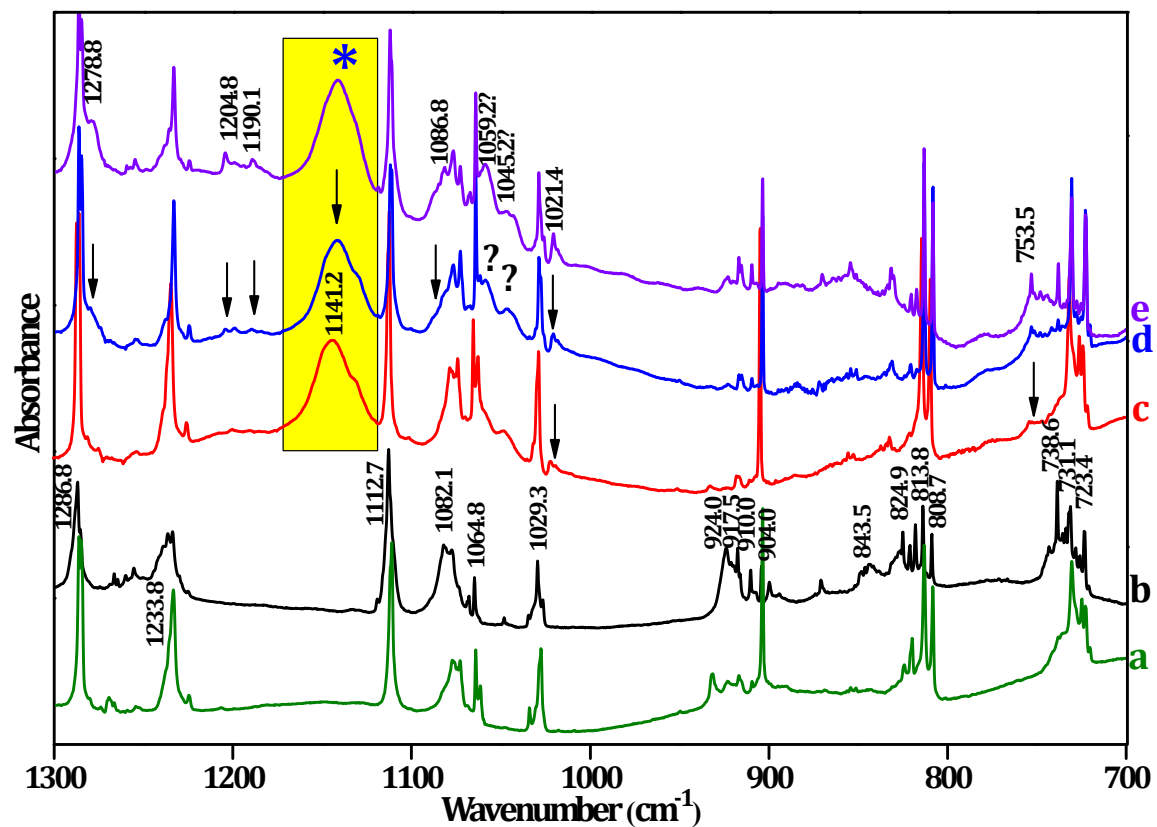

**Figure S1.** Matrix isolation infrared spectra of co-deposition experiments of M-Imid and HCl precursors in  $N_2$  matrix. Trace 'a') M-Imid: $N_2$  (2:1000) as deposited at 12 K; Trace 'b') M-Imid: $N_2$  (2:1000) at 12 K after annealing at 30 K; Trace 'c', 'd' and 'e' are as a result of the codeposition experiments of HCl/M-Imid/ $N_2$ . Trace 'c'): 12 K; Trace 'd'): 25 K – 12 K; Trace 'e'): 32 K – 12 K. The feature marked with asterisk is due to H-Cl stretching of proton shared hydrogen bonded complex.

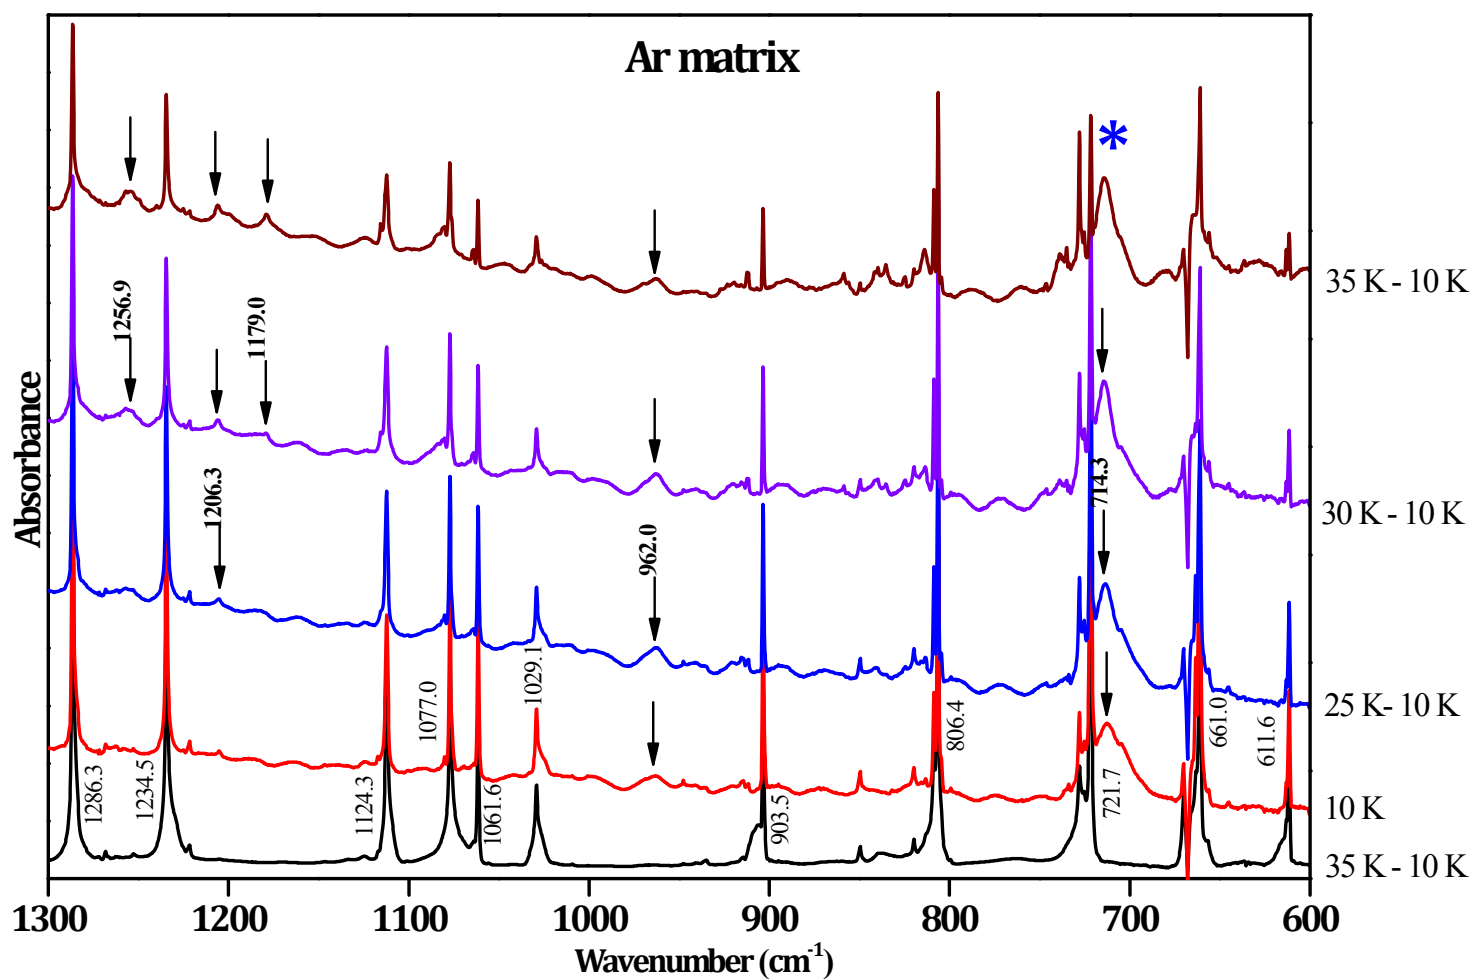

**Figure S2.** Matrix isolation infrared spectra of co-deposition experiments of M-Imid and HCl precursors in Ar matrix have been depicted. Trace ‘a’) M-Imid: $\text{N}_2$  (2:1000) as deposited at 12 K; Trace ‘b’) M-Imid:Ar (2:1000) at 12 K after annealing at 30 K; Trace ‘c’, ‘d’ and ‘e’ are as a result of the co-deposition experiments of HCl/M-Imid/ $\text{N}_2$ . Trace ‘c’): 12 K; Trace ‘d’): 25 K – 12 K; Trace ‘e’): 32 K – 12 K. The feature marked with asterisk is due to H-Cl stretching of proton shared hydrogen bonded complex.

**Table S1.** Results of energy decomposition analysis performed on the complexes A, B and C at B3LYP-D3/TZ2P level of theory For comparison, the results of NH<sub>3</sub>-HCl, Pyridine-HCl and N(CH<sub>3</sub>)<sub>3</sub>-HCl are also shown.

| Complexes            | Energy decomposition in kcal/mol |                 |            |                 |                      |
|----------------------|----------------------------------|-----------------|------------|-----------------|----------------------|
|                      | Electrostatic                    | Charge-transfer | Dispersion | Pauli repulsion | Total binding energy |
| complex A            | -25.99                           | -22.76          | -1.74      | +36.91          | -13.58               |
| complex B            | -6.08                            | -4.85           | -3.53      | +9.29           | -5.17                |
| complex C            | -2.19                            | -1.15           | -1.57      | +3.51           | -1.40                |
| NH <sub>3</sub> -HCl | -20.17                           | -16.25          | -1.15      | +26.99          | -10.58               |
| Pyridine-HCl         | -27.31                           | -25.12          | -2.00      | +41.13          | -13.3                |

**Table S2.** Results on binding energy and calculated N...H...Cl vibrational frequency (cm<sup>-1</sup>) as a result of substitution of electron withdrawing and donating groups on to the C1 carbon (flanked by two nitrogen atoms in imidazole ring) and C4 carbon are provided.

| Effect of substitution in M-Imid...HCl Complexes | Binding energy (kcal/mol) | Calculated N...H...Cl vibrational frequency (cm <sup>-1</sup> ) | Shift with respect to HCl monomer |
|--------------------------------------------------|---------------------------|-----------------------------------------------------------------|-----------------------------------|
| <b>Substitution at C1 carbon</b>                 |                           |                                                                 |                                   |
| -NO <sub>2</sub>                                 | -8.45                     | 2513.1 (1889)                                                   | -510.0                            |
| -CN                                              | -8.62                     | 2408.6 (2338)                                                   | -614.5                            |
| -H (complex A)                                   | -12.66                    | 1960.9 (3938)                                                   | -1062.2                           |
| -CH <sub>3</sub>                                 | -17.78                    | 1261.2 (2340)                                                   | -1761.9                           |
| -NH <sub>2</sub>                                 | -62.71                    | 2323.1 (2553) <sup>a</sup>                                      | --                                |
| -OH                                              | -111.97                   | 3285.9 (901) <sup>a</sup>                                       | --                                |
| <b>Substitution at C4 carbon</b>                 |                           |                                                                 |                                   |
| -NO <sub>2</sub>                                 | -8.32                     | 2530.3 (1740)                                                   | -492.7                            |
| -CN                                              | -8.51                     | 2442.7 (2050)                                                   | -580.3                            |
| -H (complex A)                                   | -12.66                    | 1960.9 (3938)                                                   | -1062.1                           |
| -CH <sub>3</sub>                                 | -14.32                    | 1739.5 (3952)                                                   | -1283.5                           |
| -NH <sub>2</sub>                                 | -16.24                    | 1322.3 (3002)                                                   | -1700.7                           |
| -OH                                              | -66.23                    | 2519.3 (1578) <sup>a</sup>                                      | --                                |

<sup>a</sup>proton transferred hydrogen bonding

**Table S3.** Results on binding energy and calculated N...H...Cl vibrational frequency (cm<sup>-1</sup>) as a result of substitution of electron withdrawing and donating groups on to the N8 nitrogen and C6 carbon are provided.

| <b>Effect of substitution in M-Imid...HCl Complexes</b> | <b>Calculated N...H...Cl vibrational frequency (cm<sup>-1</sup>)</b> | <b>Shift with respect to HCl monomer</b> |
|---------------------------------------------------------|----------------------------------------------------------------------|------------------------------------------|
| <b>Substitution at N8 nitrogen</b>                      |                                                                      |                                          |
| -NO <sub>2</sub>                                        | 2410.8 (2506)                                                        | -612.2                                   |
| -CN                                                     | 2445.1 (2380)                                                        | -577.9                                   |
| -CH <sub>3</sub> (complex A)                            | 1960.9 (3938)                                                        | -1062.1                                  |
| -H                                                      | 2071.9 (3447)                                                        | -951.1                                   |
| -NH <sub>2</sub>                                        | 2052.2 (3695)                                                        | -970.8                                   |
| -OH                                                     | 2142.6 (3340)                                                        | -880.4                                   |
| <b>Substitution at C6 carbon</b>                        |                                                                      |                                          |
| -NO <sub>2</sub>                                        | 2371.1 (2745)                                                        | -651.9                                   |
| -CN                                                     | 2321.3 (3012)                                                        | -701.7                                   |
| -H (complex A)                                          | 1960.9 (3938)                                                        | -1062.1                                  |
| -CH <sub>3</sub>                                        | 1825.9 (4462)                                                        | -1197.1                                  |
| -NH <sub>2</sub>                                        | 1836.2 (4413)                                                        | -1186.8                                  |
| -OH                                                     | 1949.5 (3969)                                                        | -1073.5                                  |
